# Supplementary material
Source: publisher figshare collection journal article supplement (https://acs.figshare.com/ndownloader/files/3962644)
Supplement: Supplementary file 1 [file 3962644]

  
data_cd213341 
  
_audit_creation_method            SHELXL-97 
_chemical_name_systematic 
; 
 ? 
; 
_chemical_name_common             ? 
_chemical_melting_point           ? 
_chemical_formula_moiety          ? 
_chemical_formula_sum 
 'C15 H11 N3 O S' 
_chemical_formula_weight          281.33 
  
loop_ 
 _atom_type_symbol 
 _atom_type_description 
 _atom_type_scat_dispersion_real 
 _atom_type_scat_dispersion_imag 
 _atom_type_scat_source 
 'C'  'C'   0.0033   0.0016 
 'International Tables Vol C Tables 4.2.6.8 and 6.1.1.4' 
 'H'  'H'   0.0000   0.0000 
 'International Tables Vol C Tables 4.2.6.8 and 6.1.1.4' 
 'N'  'N'   0.0061   0.0033 
 'International Tables Vol C Tables 4.2.6.8 and 6.1.1.4' 
 'O'  'O'   0.0106   0.0060 
 'International Tables Vol C Tables 4.2.6.8 and 6.1.1.4' 
 'S'  'S'   0.1246   0.1234 
 'International Tables Vol C Tables 4.2.6.8 and 6.1.1.4' 
  
_symmetry_cell_setting            Monoclinic 
_symmetry_space_group_name_H-M    P2(1)/c 
  
loop_ 
 _symmetry_equiv_pos_as_xyz 
 'x, y, z' 
 '-x, y+1/2, -z+1/2' 
 '-x, -y, -z' 
 'x, -y-1/2, z-1/2' 
  
_cell_length_a                    8.1738(11) 
_cell_length_b                    21.296(3) 
_cell_length_c                    8.4023(11) 
_cell_angle_alpha                 90.00 
_cell_angle_beta                  109.477(3) 
_cell_angle_gamma                 90.00 
_cell_volume                      1378.9(3) 
_cell_formula_units_Z             4 
_cell_measurement_temperature     293(2) 
_cell_measurement_reflns_used     3055 
_cell_measurement_theta_min       5.286 
_cell_measurement_theta_max       54.496 
  
_exptl_crystal_description        prismatic 
_exptl_crystal_colour             green 
_exptl_crystal_size_max           0.212 
_exptl_crystal_size_mid           0.154 
_exptl_crystal_size_min           0.112 
_exptl_crystal_density_meas       ? 
_exptl_crystal_density_diffrn     1.355 
_exptl_crystal_density_method     'not measured' 
_exptl_crystal_F_000              584 
_exptl_absorpt_coefficient_mu     0.233 
_exptl_absorpt_correction_type    empirical 
_exptl_absorpt_correction_T_min   0.20751 
_exptl_absorpt_correction_T_max   1.00000 
_exptl_absorpt_process_details    sadabs 
  
_exptl_special_details 
; 
 ? 
; 
  
_diffrn_ambient_temperature       293(2) 
_diffrn_radiation_wavelength      0.71073 
_diffrn_radiation_type            MoK\a 
_diffrn_radiation_source          'fine-focus sealed tube' 
_diffrn_radiation_monochromator   graphite 
_diffrn_measurement_device_type   'CCD area detector' 
_diffrn_measurement_method        'phi and omega scans' 
_diffrn_detector_area_resol_mean  ? 
_diffrn_standards_number          ? 
_diffrn_standards_interval_count  ? 
_diffrn_standards_interval_time   ? 
_diffrn_standards_decay_%         ? 
_diffrn_reflns_number             7757 
_diffrn_reflns_av_R_equivalents   0.0563 
_diffrn_reflns_av_sigmaI/netI     0.0571 
_diffrn_reflns_limit_h_min        -9 
_diffrn_reflns_limit_h_max        8 
_diffrn_reflns_limit_k_min        -25 
_diffrn_reflns_limit_k_max        25 
_diffrn_reflns_limit_l_min        -9 
_diffrn_reflns_limit_l_max        10 
_diffrn_reflns_theta_min          1.91 
_diffrn_reflns_theta_max          25.50 
_reflns_number_total              2567 
_reflns_number_gt                 2178 
_reflns_threshold_expression      >2sigma(I) 
  
_computing_data_collection        'Bruker SMART' 
_computing_cell_refinement        'Bruker SMART' 
_computing_data_reduction         'Bruker SHELXTL' 
_computing_structure_solution     'SHELXS-97 (Sheldrick, 1990)' 
_computing_structure_refinement   'SHELXL-97 (Sheldrick, 1997)' 
_computing_molecular_graphics     'Bruker SHELXTL' 
_computing_publication_material   'Bruker SHELXTL' 
  
_refine_special_details 
; 
 Refinement of F^2^ against ALL reflections.  The weighted R-factor wR and 
 goodness of fit S are based on F^2^, conventional R-factors R are based 
 on F, with F set to zero for negative F^2^. The threshold expression of 
 F^2^ > 2sigma(F^2^) is used only for calculating R-factors(gt) etc. and is 
 not relevant to the choice of reflections for refinement.  R-factors based 
 on F^2^ are statistically about twice as large as those based on F, and R- 
 factors based on ALL data will be even larger. 
; 
  
_refine_ls_structure_factor_coef  Fsqd 
_refine_ls_matrix_type            full 
_refine_ls_weighting_scheme       calc 
_refine_ls_weighting_details 
 'calc w=1/[\s^2^(Fo^2^)+(0.0781P)^2^+0.2255P] where P=(Fo^2^+2Fc^2^)/3' 
_atom_sites_solution_primary      direct 
_atom_sites_solution_secondary    difmap 
_atom_sites_solution_hydrogens    geom 
_refine_ls_hydrogen_treatment     constr 
_refine_ls_extinction_method      SHELXL 
_refine_ls_extinction_coef        0.046(5) 
_refine_ls_extinction_expression 
 'Fc^*^=kFc[1+0.001xFc^2^\l^3^/sin(2\q)]^-1/4^' 
_refine_ls_number_reflns          2567 
_refine_ls_number_parameters      184 
_refine_ls_number_restraints      0 
_refine_ls_R_factor_all           0.0635 
_refine_ls_R_factor_gt            0.0573 
_refine_ls_wR_factor_ref          0.1445 
_refine_ls_wR_factor_gt           0.1382 
_refine_ls_goodness_of_fit_ref    1.068 
_refine_ls_restrained_S_all       1.068 
_refine_ls_shift/su_max           0.000 
_refine_ls_shift/su_mean          0.000 
  
loop_ 
 _atom_site_label 
 _atom_site_type_symbol 
 _atom_site_fract_x 
 _atom_site_fract_y 
 _atom_site_fract_z 
 _atom_site_U_iso_or_equiv 
 _atom_site_adp_type 
 _atom_site_occupancy 
 _atom_site_symmetry_multiplicity 
 _atom_site_calc_flag 
 _atom_site_refinement_flags 
 _atom_site_disorder_assembly 
 _atom_site_disorder_group 
S1 S 1.06548(7) 0.25794(3) 0.73836(7) 0.0551(2) Uani 1 1 d . . . 
N1 N 0.8008(4) 0.39538(10) 0.5063(3) 0.0921(8) Uani 1 1 d . . . 
N2 N 0.5206(3) 0.24626(9) 0.2322(3) 0.0672(5) Uani 1 1 d . . . 
N3 N 1.1271(2) 0.13553(8) 0.7881(2) 0.0554(5) Uani 1 1 d . . . 
O1 O 0.90837(19) 0.07798(8) 0.4214(2) 0.0704(5) Uani 1 1 d . . . 
C1 C 0.8807(3) 0.28038(9) 0.5782(3) 0.0511(5) Uani 1 1 d . . . 
C2 C 0.7902(2) 0.22960(9) 0.4951(2) 0.0455(5) Uani 1 1 d . . . 
C3 C 0.8677(2) 0.17068(9) 0.5532(2) 0.0442(4) Uani 1 1 d . . . 
C4 C 1.0214(2) 0.17856(9) 0.6896(3) 0.0457(5) Uani 1 1 d . . . 
C5 C 0.8070(2) 0.11105(9) 0.4609(2) 0.0470(5) Uani 1 1 d . . . 
C6 C 0.6212(2) 0.09370(8) 0.4157(2) 0.0445(4) Uani 1 1 d . . . 
C7 C 0.5154(3) 0.11977(9) 0.4978(3) 0.0532(5) Uani 1 1 d . . . 
H7 H 0.5603 0.1497 0.5817 0.064 Uiso 1 1 calc R . . 
C8 C 0.3433(3) 0.10154(10) 0.4557(3) 0.0627(6) Uani 1 1 d . . . 
H8 H 0.2725 0.1197 0.5095 0.075 Uiso 1 1 calc R . . 
C9 C 0.2782(3) 0.05677(11) 0.3346(4) 0.0686(7) Uani 1 1 d . . . 
H9 H 0.1628 0.0445 0.3065 0.082 Uiso 1 1 calc R . . 
C10 C 0.3814(3) 0.02968(10) 0.2542(3) 0.0669(6) Uani 1 1 d . . . 
H10 H 0.3361 -0.0013 0.1733 0.080 Uiso 1 1 calc R . . 
C11 C 0.5531(3) 0.04825(9) 0.2930(3) 0.0556(5) Uani 1 1 d . . . 
H11 H 0.6223 0.0303 0.2370 0.067 Uiso 1 1 calc R . . 
C12 C 0.8384(3) 0.34424(11) 0.5394(3) 0.0610(6) Uani 1 1 d . . . 
C13 C 0.6383(3) 0.23769(10) 0.3488(3) 0.0513(5) Uani 1 1 d . . . 
C14 C 1.2860(3) 0.15433(13) 0.9182(3) 0.0782(8) Uani 1 1 d . . . 
H14A H 1.3288 0.1923 0.8845 0.117 Uiso 1 1 calc R . . 
H14B H 1.3711 0.1217 0.9347 0.117 Uiso 1 1 calc R . . 
H14C H 1.2634 0.1615 1.0218 0.117 Uiso 1 1 calc R . . 
C15 C 1.0749(3) 0.06986(11) 0.7855(3) 0.0666(6) Uani 1 1 d . . . 
H15A H 0.9527 0.0676 0.7673 0.100 Uiso 1 1 calc R . . 
H15B H 1.1378 0.0505 0.8915 0.100 Uiso 1 1 calc R . . 
H15C H 1.0999 0.0483 0.6960 0.100 Uiso 1 1 calc R . . 
  
loop_ 
 _atom_site_aniso_label 
 _atom_site_aniso_U_11 
 _atom_site_aniso_U_22 
 _atom_site_aniso_U_33 
 _atom_site_aniso_U_23 
 _atom_site_aniso_U_13 
 _atom_site_aniso_U_12 
S1 0.0531(4) 0.0493(4) 0.0610(4) -0.0037(2) 0.0164(3) -0.0132(2) 
N1 0.124(2) 0.0543(13) 0.1018(18) 0.0155(12) 0.0422(16) 0.0105(12) 
N2 0.0614(12) 0.0673(13) 0.0664(13) 0.0124(9) 0.0128(10) 0.0030(9) 
N3 0.0456(9) 0.0532(10) 0.0604(10) 0.0050(8) 0.0083(8) -0.0039(7) 
O1 0.0495(8) 0.0779(11) 0.0828(11) -0.0257(9) 0.0207(8) 0.0083(7) 
C1 0.0529(11) 0.0464(11) 0.0594(12) 0.0018(9) 0.0260(9) -0.0030(8) 
C2 0.0403(10) 0.0489(10) 0.0518(11) 0.0014(8) 0.0214(8) -0.0012(8) 
C3 0.0369(9) 0.0469(10) 0.0504(10) -0.0007(8) 0.0165(8) -0.0029(7) 
C4 0.0408(9) 0.0465(10) 0.0522(10) -0.0017(8) 0.0186(8) -0.0058(7) 
C5 0.0440(10) 0.0479(10) 0.0485(10) -0.0031(8) 0.0145(8) 0.0040(8) 
C6 0.0431(10) 0.0359(9) 0.0507(10) 0.0026(8) 0.0105(8) 0.0009(7) 
C7 0.0523(11) 0.0459(11) 0.0652(12) -0.0003(9) 0.0246(10) -0.0048(8) 
C8 0.0506(12) 0.0550(13) 0.0883(16) 0.0086(11) 0.0308(11) -0.0040(9) 
C9 0.0491(12) 0.0555(13) 0.0934(17) 0.0129(12) 0.0136(12) -0.0080(10) 
C10 0.0636(13) 0.0449(11) 0.0729(15) -0.0004(10) -0.0028(11) -0.0116(10) 
C11 0.0554(11) 0.0425(10) 0.0604(12) -0.0034(9) 0.0078(9) 0.0039(9) 
C12 0.0705(14) 0.0501(13) 0.0674(14) 0.0038(10) 0.0295(11) -0.0011(10) 
C13 0.0484(11) 0.0498(11) 0.0594(13) 0.0037(9) 0.0229(10) 0.0008(9) 
C14 0.0564(13) 0.0811(17) 0.0781(16) 0.0122(13) -0.0028(12) -0.0164(12) 
C15 0.0646(13) 0.0506(12) 0.0776(15) 0.0070(11) 0.0144(12) -0.0003(10) 
  
_geom_special_details 
; 
 All esds (except the esd in the dihedral angle between two l.s. planes) 
 are estimated using the full covariance matrix.  The cell esds are taken 
 into account individually in the estimation of esds in distances, angles 
 and torsion angles; correlations between esds in cell parameters are only 
 used when they are defined by crystal symmetry.  An approximate (isotropic) 
 treatment of cell esds is used for estimating esds involving l.s. planes. 
; 
  
loop_ 
 _geom_bond_atom_site_label_1 
 _geom_bond_atom_site_label_2 
 _geom_bond_distance 
 _geom_bond_site_symmetry_2 
 _geom_bond_publ_flag 
S1 C1 1.722(2) . ? 
S1 C4 1.7483(19) . ? 
N1 C12 1.140(3) . ? 
N2 C13 1.136(3) . ? 
N3 C4 1.339(3) . ? 
N3 C14 1.448(3) . ? 
N3 C15 1.460(3) . ? 
O1 C5 1.215(2) . ? 
C1 C2 1.364(3) . ? 
C1 C12 1.414(3) . ? 
C2 C3 1.417(3) . ? 
C2 C13 1.437(3) . ? 
C3 C4 1.400(3) . ? 
C3 C5 1.484(3) . ? 
C5 C6 1.484(3) . ? 
C6 C11 1.388(3) . ? 
C6 C7 1.389(3) . ? 
C7 C8 1.387(3) . ? 
C7 H7 0.9300 . ? 
C8 C9 1.366(4) . ? 
C8 H8 0.9300 . ? 
C9 C10 1.371(4) . ? 
C9 H9 0.9300 . ? 
C10 C11 1.389(3) . ? 
C10 H10 0.9300 . ? 
C11 H11 0.9300 . ? 
C14 H14A 0.9600 . ? 
C14 H14B 0.9600 . ? 
C14 H14C 0.9600 . ? 
C15 H15A 0.9600 . ? 
C15 H15B 0.9600 . ? 
C15 H15C 0.9600 . ? 
  
loop_ 
 _geom_angle_atom_site_label_1 
 _geom_angle_atom_site_label_2 
 _geom_angle_atom_site_label_3 
 _geom_angle 
 _geom_angle_site_symmetry_1 
 _geom_angle_site_symmetry_3 
 _geom_angle_publ_flag 
C1 S1 C4 91.53(9) . . ? 
C4 N3 C14 120.58(19) . . ? 
C4 N3 C15 121.41(17) . . ? 
C14 N3 C15 117.40(19) . . ? 
C2 C1 C12 126.6(2) . . ? 
C2 C1 S1 111.38(15) . . ? 
C12 C1 S1 122.02(16) . . ? 
C1 C2 C3 114.95(17) . . ? 
C1 C2 C13 120.61(18) . . ? 
C3 C2 C13 124.10(17) . . ? 
C4 C3 C2 110.62(16) . . ? 
C4 C3 C5 125.64(17) . . ? 
C2 C3 C5 122.96(16) . . ? 
N3 C4 C3 129.91(18) . . ? 
N3 C4 S1 118.47(15) . . ? 
C3 C4 S1 111.48(14) . . ? 
O1 C5 C6 121.23(18) . . ? 
O1 C5 C3 119.92(17) . . ? 
C6 C5 C3 118.83(16) . . ? 
C11 C6 C7 119.04(18) . . ? 
C11 C6 C5 119.11(17) . . ? 
C7 C6 C5 121.79(17) . . ? 
C8 C7 C6 120.5(2) . . ? 
C8 C7 H7 119.7 . . ? 
C6 C7 H7 119.7 . . ? 
C9 C8 C7 119.7(2) . . ? 
C9 C8 H8 120.1 . . ? 
C7 C8 H8 120.1 . . ? 
C8 C9 C10 120.7(2) . . ? 
C8 C9 H9 119.7 . . ? 
C10 C9 H9 119.7 . . ? 
C9 C10 C11 120.3(2) . . ? 
C9 C10 H10 119.9 . . ? 
C11 C10 H10 119.9 . . ? 
C6 C11 C10 119.8(2) . . ? 
C6 C11 H11 120.1 . . ? 
C10 C11 H11 120.1 . . ? 
N1 C12 C1 178.6(3) . . ? 
N2 C13 C2 177.4(2) . . ? 
N3 C14 H14A 109.5 . . ? 
N3 C14 H14B 109.5 . . ? 
H14A C14 H14B 109.5 . . ? 
N3 C14 H14C 109.5 . . ? 
H14A C14 H14C 109.5 . . ? 
H14B C14 H14C 109.5 . . ? 
N3 C15 H15A 109.5 . . ? 
N3 C15 H15B 109.5 . . ? 
H15A C15 H15B 109.5 . . ? 
N3 C15 H15C 109.5 . . ? 
H15A C15 H15C 109.5 . . ? 
H15B C15 H15C 109.5 . . ? 
  
loop_ 
 _geom_torsion_atom_site_label_1 
 _geom_torsion_atom_site_label_2 
 _geom_torsion_atom_site_label_3 
 _geom_torsion_atom_site_label_4 
 _geom_torsion 
 _geom_torsion_site_symmetry_1 
 _geom_torsion_site_symmetry_2 
 _geom_torsion_site_symmetry_3 
 _geom_torsion_site_symmetry_4 
 _geom_torsion_publ_flag 
C4 S1 C1 C2 0.98(16) . . . . ? 
C4 S1 C1 C12 -176.76(18) . . . . ? 
C12 C1 C2 C3 175.91(19) . . . . ? 
S1 C1 C2 C3 -1.7(2) . . . . ? 
C12 C1 C2 C13 2.3(3) . . . . ? 
S1 C1 C2 C13 -175.36(14) . . . . ? 
C1 C2 C3 C4 1.7(2) . . . . ? 
C13 C2 C3 C4 175.06(17) . . . . ? 
C1 C2 C3 C5 -168.77(17) . . . . ? 
C13 C2 C3 C5 4.6(3) . . . . ? 
C14 N3 C4 C3 176.8(2) . . . . ? 
C15 N3 C4 C3 -12.4(3) . . . . ? 
C14 N3 C4 S1 -7.8(3) . . . . ? 
C15 N3 C4 S1 163.00(17) . . . . ? 
C2 C3 C4 N3 174.81(19) . . . . ? 
C5 C3 C4 N3 -15.1(3) . . . . ? 
C2 C3 C4 S1 -0.9(2) . . . . ? 
C5 C3 C4 S1 169.26(15) . . . . ? 
C1 S1 C4 N3 -176.27(17) . . . . ? 
C1 S1 C4 C3 -0.05(15) . . . . ? 
C4 C3 C5 O1 -44.2(3) . . . . ? 
C2 C3 C5 O1 124.8(2) . . . . ? 
C4 C3 C5 C6 137.02(19) . . . . ? 
C2 C3 C5 C6 -54.0(3) . . . . ? 
O1 C5 C6 C11 -15.9(3) . . . . ? 
C3 C5 C6 C11 162.83(18) . . . . ? 
O1 C5 C6 C7 161.3(2) . . . . ? 
C3 C5 C6 C7 -19.9(3) . . . . ? 
C11 C6 C7 C8 -1.2(3) . . . . ? 
C5 C6 C7 C8 -178.44(19) . . . . ? 
C6 C7 C8 C9 1.2(3) . . . . ? 
C7 C8 C9 C10 -0.1(4) . . . . ? 
C8 C9 C10 C11 -1.0(4) . . . . ? 
C7 C6 C11 C10 0.1(3) . . . . ? 
C5 C6 C11 C10 177.40(19) . . . . ? 
C9 C10 C11 C6 1.0(3) . . . . ? 
C2 C1 C12 N1 21(11) . . . . ? 
S1 C1 C12 N1 -162(11) . . . . ? 
C1 C2 C13 N2 24(5) . . . . ? 
C3 C2 C13 N2 -149(5) . . . . ? 
  
_diffrn_measured_fraction_theta_max    1.000 
_diffrn_reflns_theta_full              25.50 
_diffrn_measured_fraction_theta_full   1.000 
_refine_diff_density_max    0.343 
_refine_diff_density_min   -0.370 
_refine_diff_density_rms    0.097 
